# Supplementary material for: Broadband near-infrared persistent luminescence in Ni2+-doped transparent glass-ceramic ZnGa2O4
Source: Royal Society of Chemistry journal article supplement (doi:10.1039/d1nj04496f), 2021-11-30
Supplement: d1nj04496f1.pdf [file d1nj04496f1.pdf]

## Electronic Supplementary Information (ESI)

### **Broadband near infrared persistent luminescence in Ni<sup>2+</sup>-doped transparent glass ceramic ZnGa<sub>2</sub>O<sub>4</sub>†**

Tianpeng Liu<sup>a</sup>, Zhiyuan Liu<sup>a</sup>, Kang Zhang<sup>a</sup>, Hongxiang An<sup>a</sup>, Zhiyu Hu<sup>a</sup>, Shuwei Deng<sup>a</sup>, Xiaoshuang Li<sup>\*a</sup> and Haifeng Li<sup>\*b</sup>

<sup>a</sup> *School of Applied Physics and Materials, Wuyi University, Jiangmen, Guangdong*

*529020, P.R. China. E-mail: [lixiaoshuang12@mails.ucas.ac.cn](mailto:lixiaoshuang12@mails.ucas.ac.cn)*

<sup>b</sup> *Joint Key Laboratory of the Ministry of Education, Institute of Applied Physics and*

*Materials Engineering, University of Macau, Avenida da Universidade, Taipa, Macau*

*SAR, 999078, China. E-mail: [haifengli@um.edu.mo](mailto:haifengli@um.edu.mo)*

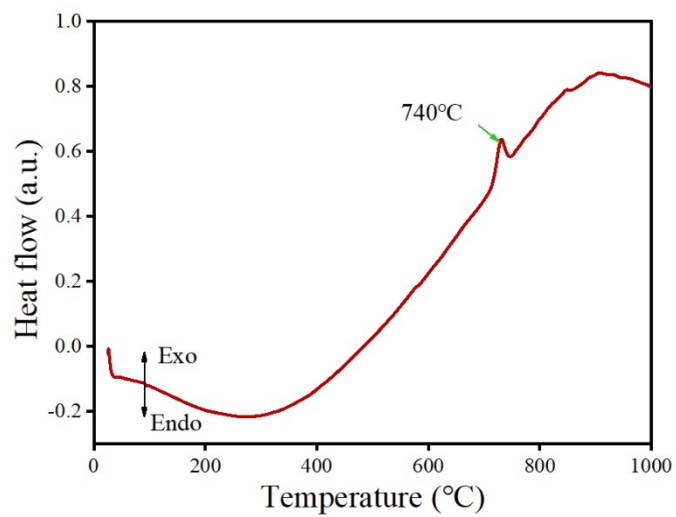

**Fig. S1.** DSC trace of ZnGa<sub>2</sub>O<sub>4</sub>:0.05Ni<sup>2+</sup> PG.

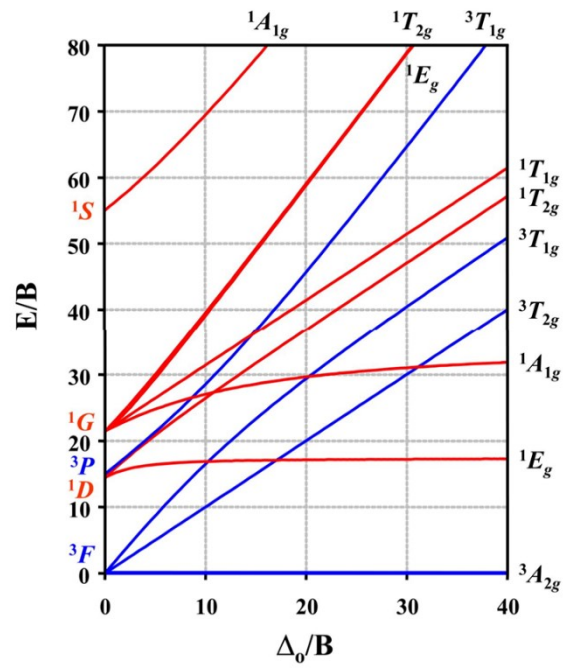

**Fig. S2.** Tanabe-Sugano diagram in which the straight lines indicate the crystal field of Ni<sup>2+</sup> in the ZnGa<sub>2</sub>O<sub>4</sub> host.

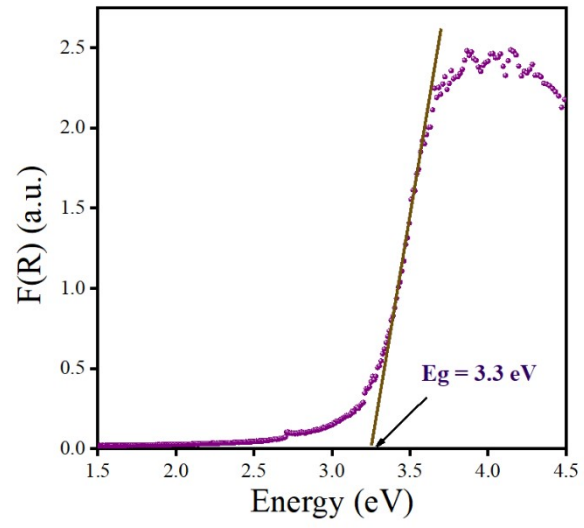

**Fig. S3.** The calculated bandgap of ZnGa<sub>2</sub>O<sub>4</sub> host.
